# Supplementary material for: Climate factors associated with cancer incidence: An ecological study covering 33 cancers from population-based registries in 37 countries
Source: PLOS journal article supplement (doi:10.1371/journal.pclm.0000362), 2024-03-28
Supplement: S6 (10.1371/journal.pclm.0000362.s006) [file journal.pclm.0000362.s006]

## Sheet: Supp Table 6
S6 Table. Estimate of per 10 DU increase of total ozone concentration on cancer incidences in different lag periods, 95% confidence interval
Cancer Site	Gender	Estimate with 95% confidence interval in different lag years
		0	1	2	3	4	5	6	7	8	9	10
Lip and oral cavity	Male	0.19(-0.08,0.46)	0.18(-0.18,0.54)	-0.02(-0.24,0.21)	-0.05(-0.24,0.13)	-0.12(-0.29,0.05)	-0.13(-0.26,0.01)	-0.15(-0.27,-0.03)	-0.22(-0.34,-0.11)	-0.19(-0.31,-0.08)	-0.1(-0.21,0.01)	0.07(-0.03,0.18)
Salivary glands	Male	0.09(-0.12,0.3)	0.02(-0.26,0.3)	0.01(-0.16,0.18)	-0.01(-0.16,0.13)	0.03(-0.1,0.16)	0.02(-0.09,0.12)	0.02(-0.07,0.11)	-0.01(-0.1,0.08)	-0.01(-0.1,0.08)	-0.01(-0.09,0.08)	0(-0.08,0.08)
Oropharynx	Male	0.22(-0.16,0.6)	0.14(-0.37,0.65)	-0.16(-0.47,0.15)	0.02(-0.24,0.28)	0.02(-0.22,0.25)	-0.01(-0.19,0.18)	-0.04(-0.21,0.13)	-0.03(-0.2,0.13)	0.04(-0.12,0.2)	0.01(-0.14,0.17)	0.07(-0.08,0.22)
Nasopharynx	Male	0.06(-0.1,0.22)	0.08(-0.13,0.29)	0.04(-0.09,0.17)	0(-0.11,0.11)	0.01(-0.09,0.11)	0.02(-0.05,0.1)	0.04(-0.03,0.11)	0.02(-0.05,0.09)	-0.01(-0.08,0.05)	-0.03(-0.09,0.04)	-0.03(-0.1,0.03)
Hypopharynx	Male	-0.14(-0.35,0.08)	-0.17(-0.45,0.12)	0(-0.18,0.17)	0(-0.15,0.15)	0.02(-0.11,0.15)	0.02(-0.09,0.12)	0.07(-0.03,0.16)	0.03(-0.07,0.12)	0(-0.09,0.09)	-0.04(-0.12,0.05)	-0.04(-0.12,0.05)
Esophagus	Male	0.37(-0.14,0.88)	0.04(-0.65,0.72)	0.03(-0.39,0.46)	-0.08(-0.44,0.27)	-0.12(-0.44,0.2)	-0.2(-0.45,0.06)	-0.1(-0.33,0.13)	-0.01(-0.23,0.21)	0.12(-0.1,0.33)	0.12(-0.09,0.33)	0.08(-0.12,0.28)
Stomach	Male	0.02(-0.49,0.53)	0.23(-0.46,0.92)	-0.14(-0.57,0.28)	-0.14(-0.5,0.22)	-0.25(-0.57,0.07)	-0.17(-0.43,0.08)	-0.09(-0.32,0.14)	0.01(-0.22,0.23)	0.1(-0.12,0.32)	0.09(-0.12,0.3)	0.08(-0.12,0.28)
Colorectum	Male	-0.36(-1.78,1.07)	-0.54(-2.45,1.37)	1.43(0.24,2.61)	0.91(-0.08,1.9)	0.93(0.04,1.82)	0.45(-0.26,1.16)	0.44(-0.2,1.08)	-0.12(-0.74,0.5)	-0.47(-1.08,0.13)	-0.47(-1.05,0.12)	-0.35(-0.91,0.21)
Liver	Male	0.66(0.13,1.19)	0.45(-0.26,1.16)	-0.24(-0.68,0.2)	-0.51(-0.88,-0.14)	-0.27(-0.6,0.06)	-0.03(-0.29,0.24)	0.06(-0.17,0.3)	0.04(-0.19,0.27)	0.1(-0.13,0.32)	0.2(-0.02,0.42)	0.24(0.04,0.45)
Gallbladder	Male	0.03(-0.09,0.16)	0(-0.16,0.17)	0.02(-0.09,0.12)	-0.01(-0.1,0.07)	0(-0.08,0.08)	-0.02(-0.08,0.04)	-0.01(-0.06,0.05)	-0.02(-0.07,0.04)	-0.02(-0.07,0.03)	-0.04(-0.09,0.01)	-0.04(-0.09,0.01)
Pancreas	Male	-0.05(-0.69,0.58)	-0.14(-1,0.71)	-0.12(-0.65,0.4)	-0.06(-0.5,0.38)	0.01(-0.38,0.41)	0.03(-0.29,0.35)	-0.06(-0.35,0.23)	-0.09(-0.36,0.19)	0.07(-0.21,0.34)	0.15(-0.12,0.41)	0.14(-0.11,0.38)
Larynx	Male	-0.27(-0.79,0.25)	-0.42(-1.12,0.28)	-0.04(-0.47,0.4)	-0.19(-0.56,0.17)	-0.29(-0.62,0.03)	-0.25(-0.51,0.01)	-0.07(-0.31,0.16)	-0.01(-0.24,0.22)	0.04(-0.19,0.26)	-0.01(-0.23,0.2)	-0.04(-0.25,0.16)
Lung, bronchus, and trachea	Male	-1.02(-2.77,0.72)	-0.79(-3.13,1.55)	0.64(-0.8,2.09)	0.09(-1.12,1.31)	-0.68(-1.77,0.41)	-1.33(-2.2,-0.46)	-1.01(-1.79,-0.23)	-0.75(-1.51,0.01)	-0.16(-0.9,0.58)	-0.15(-0.87,0.56)	-0.2(-0.89,0.48)
Melanoma of the skin	Male	-0.7(-1.69,0.28)	-0.37(-1.69,0.96)	-0.3(-1.12,0.52)	0.28(-0.41,0.96)	0.37(-0.25,0.98)	0.3(-0.19,0.79)	0.06(-0.38,0.51)	-0.23(-0.66,0.19)	-0.25(-0.67,0.17)	-0.21(-0.62,0.2)	0(-0.39,0.38)
Mesothelioma	Male	-0.15(-0.33,0.03)	-0.11(-0.35,0.14)	0.03(-0.12,0.18)	0.04(-0.09,0.17)	0.07(-0.04,0.19)	0.06(-0.03,0.15)	0.08(0,0.17)	0.02(-0.06,0.1)	-0.03(-0.11,0.04)	-0.06(-0.14,0.01)	-0.07(-0.14,0)
Kaposi sarcoma	Male	-0.01(-0.14,0.12)	-0.04(-0.22,0.13)	0.01(-0.1,0.11)	-0.01(-0.1,0.08)	0(-0.09,0.08)	-0.02(-0.08,0.05)	-0.02(-0.08,0.04)	-0.02(-0.07,0.04)	-0.03(-0.09,0.03)	-0.01(-0.07,0.04)	-0.01(-0.06,0.05)
Penis	Male	0.04(-0.14,0.22)	0.04(-0.2,0.29)	-0.06(-0.21,0.09)	-0.05(-0.17,0.08)	0.01(-0.1,0.13)	0.06(-0.03,0.15)	0.03(-0.05,0.12)	0(-0.08,0.08)	-0.04(-0.12,0.04)	-0.02(-0.09,0.05)	-0.01(-0.08,0.07)
Prostate	Male	-4.43(-6.74,-2.12)	-10.51(-13.61,-7.42)	-0.51(-2.43,1.41)	-0.03(-1.64,1.58)	1.31(-0.14,2.75)	1.07(-0.08,2.22)	0.56(-0.48,1.6)	0.96(-0.04,1.97)	-0.28(-1.26,0.71)	-0.26(-1.21,0.7)	-2.16(-3.07,-1.26)
Testis	Male	0.17(-0.45,0.78)	0.09(-0.74,0.92)	0.05(-0.46,0.56)	0.16(-0.27,0.59)	-0.01(-0.39,0.38)	0.01(-0.3,0.31)	0.06(-0.22,0.33)	0.09(-0.18,0.35)	0.03(-0.23,0.29)	-0.05(-0.3,0.2)	0.02(-0.22,0.26)
Kidney	Male	0.09(-0.85,1.03)	-0.07(-1.32,1.19)	-0.1(-0.87,0.68)	0.08(-0.57,0.74)	0.16(-0.42,0.75)	0.15(-0.32,0.61)	0.1(-0.32,0.52)	0.32(-0.09,0.73)	0.22(-0.18,0.62)	0.12(-0.26,0.51)	-0.24(-0.6,0.13)
Bladder	Male	-0.44(-1.37,0.5)	-0.28(-1.53,0.97)	-0.14(-0.91,0.63)	0.22(-0.43,0.86)	0.41(-0.17,0.99)	0.29(-0.17,0.76)	0.25(-0.17,0.67)	0.15(-0.25,0.55)	0.02(-0.38,0.42)	-0.11(-0.5,0.27)	-0.15(-0.52,0.21)
Brain and central nervous system	Male	0.33(-0.39,1.06)	0.45(-0.53,1.43)	-0.18(-0.79,0.42)	0.05(-0.45,0.56)	0.13(-0.33,0.58)	0.21(-0.16,0.57)	-0.05(-0.38,0.28)	-0.13(-0.44,0.19)	-0.17(-0.48,0.14)	-0.09(-0.39,0.21)	-0.11(-0.4,0.17)
Thyroid	Male	-0.1(-0.59,0.39)	0.07(-0.59,0.73)	0.32(-0.08,0.73)	0.3(-0.04,0.64)	0.42(0.12,0.73)	0.24(0,0.49)	0.2(-0.02,0.42)	0.24(0.03,0.45)	0.25(0.04,0.46)	0.23(0.03,0.43)	0.16(-0.03,0.35)
Hodgkin lymphoma	Male	0.2(-0.31,0.71)	0.58(-0.11,1.26)	0.04(-0.38,0.46)	0.05(-0.3,0.41)	-0.05(-0.37,0.27)	-0.03(-0.28,0.23)	0.09(-0.14,0.32)	0.05(-0.17,0.28)	0.04(-0.18,0.26)	-0.09(-0.3,0.12)	-0.07(-0.27,0.13)
Non-Hodgkin lymphoma	Male	-0.56(-1.49,0.38)	0.09(-1.17,1.34)	-0.3(-1.08,0.48)	-0.2(-0.85,0.46)	-0.1(-0.69,0.48)	0.35(-0.12,0.82)	0.27(-0.15,0.69)	0.04(-0.37,0.45)	-0.2(-0.6,0.2)	-0.2(-0.59,0.18)	0.03(-0.33,0.4)
Multiple myeloma	Male	0.4(-0.07,0.86)	0.71(0.08,1.33)	0.01(-0.38,0.39)	0.02(-0.3,0.35)	-0.02(-0.31,0.27)	0.07(-0.17,0.3)	0.02(-0.19,0.23)	-0.12(-0.32,0.09)	-0.14(-0.34,0.06)	-0.05(-0.24,0.15)	0.19(0.01,0.37)
Leukemia	Male	0.04(-0.67,0.75)	0.04(-0.91,0.99)	0.12(-0.46,0.71)	0.02(-0.47,0.51)	-0.07(-0.51,0.37)	0.04(-0.31,0.39)	0.01(-0.31,0.32)	0.04(-0.27,0.34)	-0.04(-0.34,0.26)	0.03(-0.26,0.32)	0.07(-0.21,0.35)
Lip and oral cavity	Female	0.04(-0.06,0.14)	0.07(-0.06,0.2)	0.01(-0.07,0.09)	0(-0.07,0.07)	-0.01(-0.07,0.06)	-0.03(-0.08,0.02)	-0.02(-0.06,0.03)	-0.01(-0.05,0.03)	0(-0.04,0.05)	0(-0.04,0.04)	0(-0.04,0.04)
Salivary glands	Female	0.1(-0.1,0.31)	-0.09(-0.36,0.18)	-0.01(-0.17,0.16)	-0.06(-0.2,0.09)	-0.05(-0.18,0.07)	-0.1(-0.21,0)	-0.06(-0.15,0.03)	-0.03(-0.12,0.06)	0.02(-0.07,0.1)	0.06(-0.02,0.14)	0.05(-0.03,0.13)
Oropharynx	Female	-0.04(-0.22,0.13)	0(-0.24,0.23)	-0.05(-0.2,0.09)	-0.03(-0.15,0.09)	-0.05(-0.16,0.06)	-0.08(-0.16,0.01)	-0.05(-0.13,0.03)	-0.04(-0.11,0.04)	0.02(-0.05,0.1)	0.02(-0.05,0.09)	0.04(-0.03,0.11)
Nasopharynx	Female	-0.01(-0.13,0.11)	-0.01(-0.16,0.15)	0.01(-0.08,0.11)	0.02(-0.06,0.1)	0.01(-0.06,0.09)	-0.01(-0.06,0.05)	-0.05(-0.1,0.01)	-0.02(-0.08,0.03)	-0.01(-0.06,0.04)	0.02(-0.03,0.06)	0.01(-0.04,0.05)
Hypopharynx	Female	0(-0.09,0.09)	0(-0.12,0.12)	-0.02(-0.1,0.05)	0(-0.06,0.07)	0(-0.06,0.05)	0.01(-0.04,0.05)	-0.01(-0.05,0.04)	-0.01(-0.05,0.03)	-0.01(-0.05,0.03)	-0.01(-0.04,0.03)	0.01(-0.02,0.05)
Esophagus	Female	0.12(-0.1,0.35)	0.11(-0.19,0.41)	0.03(-0.16,0.21)	0.03(-0.13,0.18)	0.06(-0.08,0.2)	0.07(-0.05,0.18)	0(-0.1,0.1)	-0.08(-0.17,0.02)	-0.08(-0.18,0.01)	-0.05(-0.14,0.04)	0.01(-0.07,0.1)
Stomach	Female	-0.08(-0.43,0.28)	0(-0.48,0.48)	-0.05(-0.35,0.24)	-0.03(-0.27,0.22)	-0.08(-0.3,0.14)	-0.14(-0.32,0.03)	-0.09(-0.25,0.07)	-0.03(-0.18,0.13)	0.05(-0.1,0.2)	0(-0.14,0.15)	0.01(-0.13,0.15)
Colorectum	Female	0.4(-0.78,1.59)	0.3(-1.29,1.89)	0.66(-0.32,1.64)	0.61(-0.22,1.43)	0.66(-0.08,1.4)	0.59(0,1.18)	0.62(0.09,1.15)	0.49(-0.03,1)	-0.03(-0.54,0.47)	-0.25(-0.74,0.24)	-0.38(-0.84,0.09)
Liver	Female	0.23(-0.06,0.52)	0.22(-0.17,0.61)	-0.21(-0.45,0.03)	-0.17(-0.37,0.03)	-0.08(-0.26,0.1)	0(-0.15,0.14)	-0.04(-0.17,0.09)	-0.04(-0.16,0.09)	-0.02(-0.15,0.1)	0.03(-0.09,0.15)	0.04(-0.08,0.15)
Gallbladder	Female	-0.09(-0.31,0.12)	0.17(-0.11,0.46)	0.09(-0.09,0.26)	0.1(-0.05,0.24)	0.01(-0.12,0.14)	0.01(-0.1,0.12)	0.01(-0.08,0.11)	-0.03(-0.13,0.06)	-0.06(-0.16,0.03)	-0.1(-0.19,-0.01)	-0.05(-0.13,0.03)
Pancreas	Female	0.32(-0.28,0.92)	0.9(0.09,1.7)	0.26(-0.24,0.76)	0.05(-0.37,0.46)	0.07(-0.31,0.44)	0.06(-0.24,0.36)	0.06(-0.21,0.33)	0.06(-0.2,0.32)	0.03(-0.22,0.29)	-0.04(-0.29,0.2)	-0.19(-0.42,0.05)
Larynx	Female	-0.02(-0.27,0.23)	0(-0.33,0.34)	0.02(-0.19,0.22)	0.03(-0.14,0.21)	0.01(-0.15,0.16)	-0.02(-0.14,0.11)	-0.02(-0.13,0.09)	0(-0.11,0.11)	0.02(-0.09,0.12)	0(-0.1,0.1)	-0.02(-0.12,0.07)
Lung, bronchus, and trachea	Female	-1.16(-2.45,0.13)	0.01(-1.73,1.74)	0.14(-0.93,1.21)	-0.12(-1.02,0.78)	0.1(-0.7,0.91)	0.36(-0.29,1)	0.26(-0.32,0.84)	-0.16(-0.72,0.4)	-0.31(-0.86,0.24)	-0.26(-0.79,0.27)	-0.1(-0.61,0.4)
Melanoma of the skin	Female	0(-0.91,0.91)	-0.51(-1.73,0.71)	-0.47(-1.22,0.28)	0(-0.63,0.64)	0.22(-0.35,0.79)	0.15(-0.31,0.6)	0.02(-0.38,0.43)	0.01(-0.38,0.41)	-0.05(-0.43,0.34)	-0.16(-0.53,0.22)	-0.1(-0.46,0.26)
Mesothelioma	Female	-0.01(-0.12,0.09)	0.07(-0.07,0.21)	0.04(-0.04,0.13)	-0.01(-0.08,0.07)	-0.04(-0.1,0.03)	-0.01(-0.07,0.04)	-0.01(-0.05,0.04)	-0.01(-0.05,0.04)	-0.02(-0.07,0.02)	-0.01(-0.05,0.04)	0.01(-0.03,0.05)
Breast	Female	1.04(-1.04,3.12)	0.36(-2.43,3.14)	0.73(-1,2.45)	1.24(-0.21,2.68)	1.5(0.21,2.8)	0.74(-0.29,1.78)	-0.3(-1.23,0.64)	-0.61(-1.52,0.29)	-0.67(-1.55,0.22)	0.24(-0.62,1.09)	0.76(-0.05,1.58)
Vulva	Female	-0.11(-0.4,0.19)	-0.09(-0.49,0.31)	-0.08(-0.33,0.17)	0(-0.2,0.21)	-0.02(-0.2,0.17)	-0.05(-0.2,0.09)	-0.07(-0.2,0.07)	-0.08(-0.21,0.05)	-0.05(-0.18,0.08)	0.01(-0.11,0.13)	0.04(-0.07,0.16)
Vagina	Female	0.02(-0.12,0.17)	-0.12(-0.32,0.07)	0.02(-0.1,0.14)	-0.04(-0.14,0.06)	0(-0.09,0.09)	0(-0.07,0.07)	0(-0.06,0.07)	0.02(-0.04,0.09)	0.01(-0.06,0.07)	0.01(-0.05,0.07)	-0.01(-0.07,0.04)
Cervix uteri	Female	0.07(-0.55,0.69)	0.02(-0.81,0.86)	0.03(-0.49,0.54)	-0.01(-0.44,0.43)	-0.24(-0.63,0.15)	-0.42(-0.73,-0.11)	-0.47(-0.75,-0.19)	-0.32(-0.59,-0.05)	-0.17(-0.43,0.1)	0.03(-0.23,0.29)	0.15(-0.09,0.4)
Corpus uteri	Female	1.19(0.25,2.13)	1.73(0.46,3)	0(-0.78,0.79)	-0.13(-0.79,0.53)	-0.2(-0.79,0.39)	-0.08(-0.55,0.39)	-0.09(-0.51,0.33)	-0.1(-0.51,0.31)	0.12(-0.28,0.52)	0.23(-0.16,0.61)	0.55(0.18,0.92)
Ovary	Female	-0.28(-0.91,0.34)	-0.45(-1.29,0.39)	0.17(-0.35,0.69)	0.08(-0.36,0.51)	0.13(-0.26,0.53)	0.02(-0.29,0.33)	0.04(-0.24,0.32)	0.04(-0.23,0.31)	0.09(-0.18,0.35)	0.15(-0.11,0.4)	0.09(-0.16,0.33)
Kidney	Female	0.08(-0.61,0.77)	0.06(-0.87,0.98)	-0.27(-0.84,0.3)	0.01(-0.47,0.49)	0.13(-0.3,0.56)	0.2(-0.14,0.54)	0.08(-0.23,0.38)	-0.01(-0.31,0.29)	-0.06(-0.35,0.24)	0.01(-0.28,0.29)	0.13(-0.14,0.4)
Bladder	Female	0.12(-0.31,0.56)	0.58(-0.01,1.17)	-0.03(-0.39,0.34)	0.13(-0.17,0.44)	0.1(-0.17,0.38)	0.2(-0.02,0.42)	0.25(0.06,0.45)	0.12(-0.07,0.31)	-0.03(-0.22,0.15)	-0.21(-0.39,-0.03)	-0.09(-0.27,0.08)
Brain and central nervous system	Female	0.25(-0.35,0.85)	0.43(-0.37,1.23)	0.11(-0.38,0.6)	-0.06(-0.48,0.35)	-0.06(-0.43,0.31)	0.13(-0.17,0.43)	0.22(-0.05,0.49)	0.14(-0.12,0.39)	-0.02(-0.27,0.24)	-0.15(-0.39,0.1)	-0.14(-0.37,0.1)
Thyroid	Female	-0.88(-1.93,0.18)	-0.03(-1.45,1.39)	1.29(0.42,2.17)	1.7(0.96,2.43)	2.17(1.51,2.83)	1.83(1.3,2.35)	1.55(1.08,2.03)	1.32(0.86,1.78)	0.77(0.31,1.22)	0.36(-0.07,0.8)	0.01(-0.4,0.43)
Hodgkin lymphoma	Female	-0.08(-0.52,0.37)	0.04(-0.56,0.63)	-0.09(-0.46,0.28)	0.11(-0.2,0.42)	0.06(-0.21,0.34)	0.13(-0.09,0.35)	0.05(-0.15,0.25)	0.06(-0.13,0.25)	0.08(-0.11,0.27)	0.06(-0.12,0.25)	0.02(-0.15,0.2)
Non-Hodgkin lymphoma	Female	0.56(-0.29,1.4)	0.3(-0.84,1.43)	-0.1(-0.8,0.6)	-0.23(-0.82,0.36)	0.15(-0.38,0.68)	0.23(-0.19,0.65)	0.11(-0.27,0.49)	0.05(-0.32,0.41)	0(-0.36,0.36)	0.15(-0.2,0.5)	0.14(-0.2,0.47)
Multiple myeloma	Female	-0.03(-0.43,0.37)	0.13(-0.4,0.66)	-0.04(-0.37,0.29)	0.01(-0.26,0.29)	-0.09(-0.34,0.15)	-0.04(-0.24,0.16)	-0.02(-0.19,0.16)	0.03(-0.15,0.2)	0.04(-0.13,0.21)	0.03(-0.13,0.2)	0.11(-0.05,0.26)
Leukemia	Female	-0.22(-0.75,0.31)	-0.73(-1.44,-0.02)	-0.01(-0.45,0.42)	-0.07(-0.44,0.3)	-0.05(-0.38,0.28)	-0.03(-0.29,0.24)	0.01(-0.23,0.24)	0.07(-0.16,0.3)	0.05(-0.18,0.27)	0.1(-0.11,0.32)	0.13(-0.08,0.33)
